# Supplementary material for: A nitrogen-doped three-dimensional carbon framework for high performance sodium ion batteries
Source: Royal Society of Chemistry journal article supplement (doi:10.1039/c6ra27088c), 2017-01-01
Supplement: c6ra27088c1.pdf [file c6ra27088c1.pdf]

## Supporting information

# A nitrogen-doped three-dimensional carbon framework for high performance sodium ion batteries

Ying Wang,<sup>a</sup> Caiyun Wang,<sup>c</sup> Huinan Guo,<sup>b</sup> Yijing Wang,<sup>b,\*</sup> Zhenguo Huang<sup>d,\*</sup>

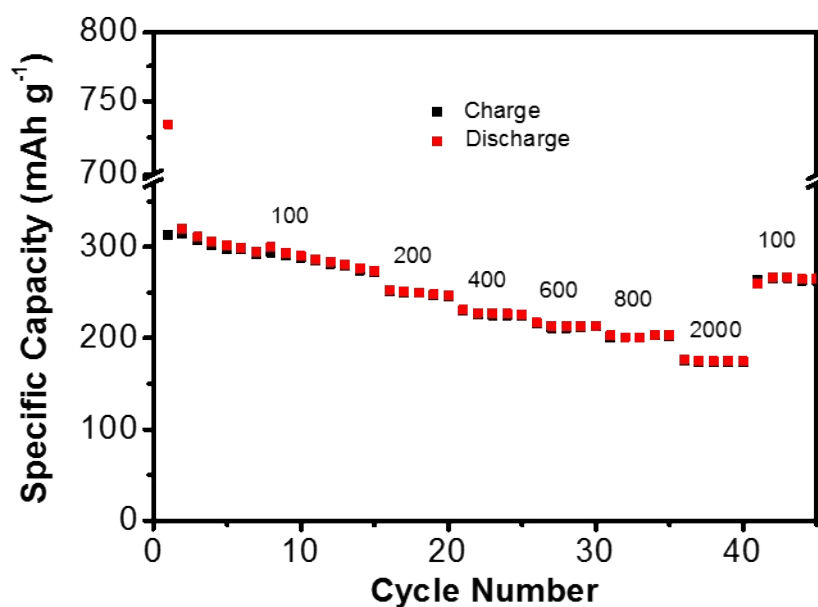

**Fig. S1** Rate capability of the 3D NCF at various current density (unit: mA g<sup>-1</sup>).

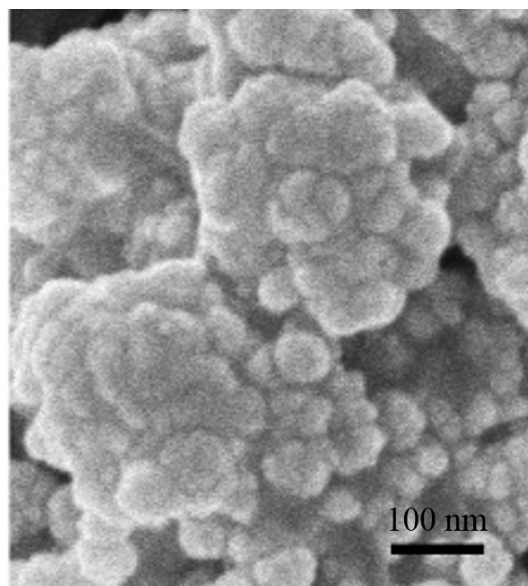

**Fig. S2** SEM images of the 3D NCF after 200 cycles.
